# Supplementary material for: Development of a transdiagnostic, low-intensity, psychological intervention for common adolescent mental health problems in Indian secondary schools
Source: PubMed Central journal article supplement (PMC7322400; doi:10.1016/j.brat.2019.103439), 2020-07

BOOK 3  
AJAY AND  
PRIYANKA'S  
'POD'  
ADVENTURES

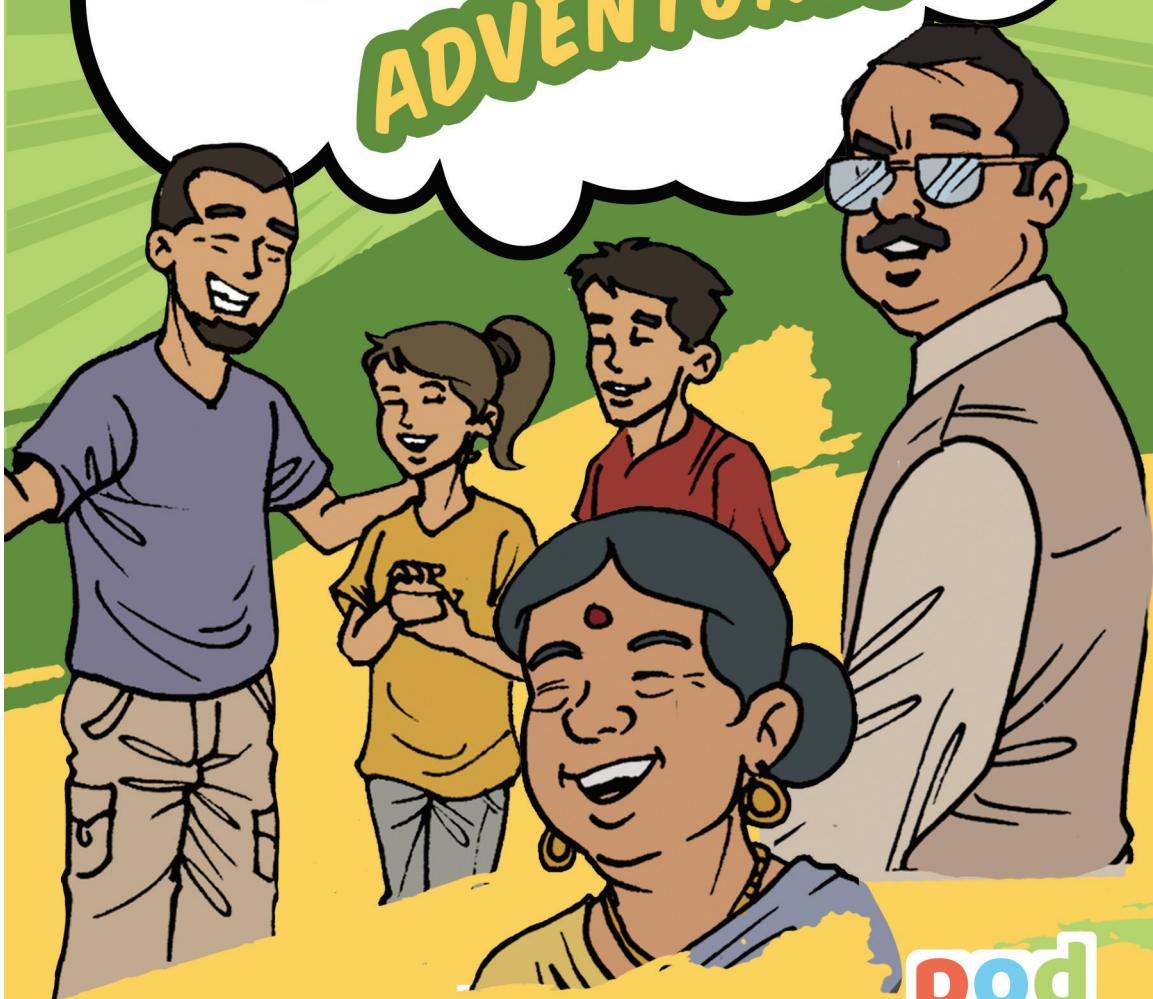

pod

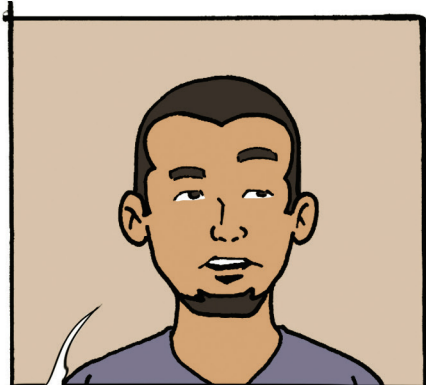

And Priyanka, which problem would YOU like to try and solve?

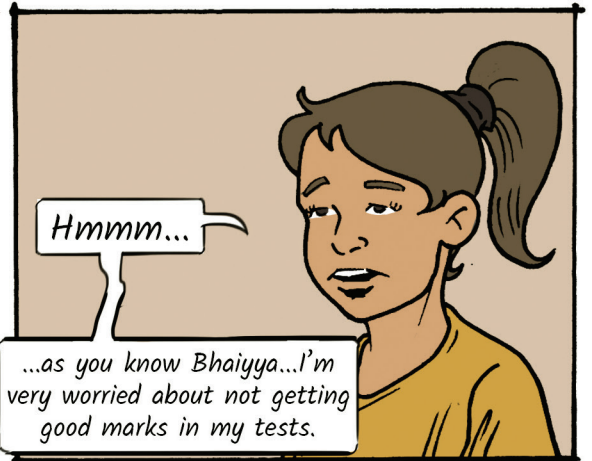

Hmmm...

...as you know Bhaiyya...I'm very worried about not getting good marks in my tests.

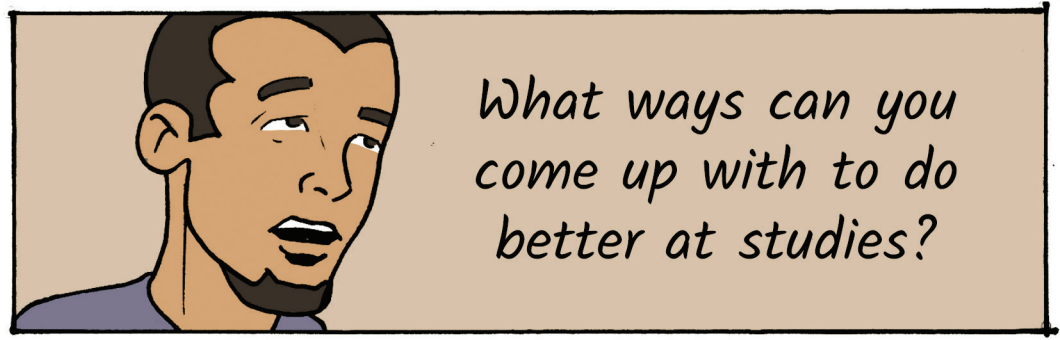

What ways can you come up with to do better at studies?

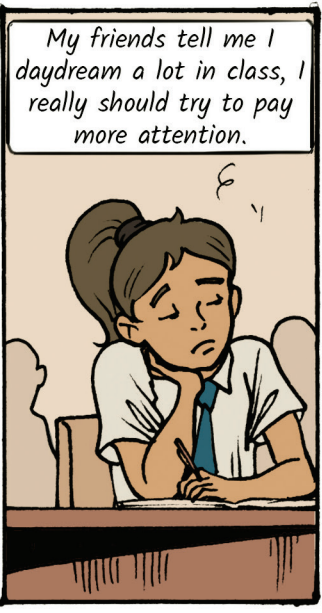

My friends tell me I daydream a lot in class, I really should try to pay more attention.

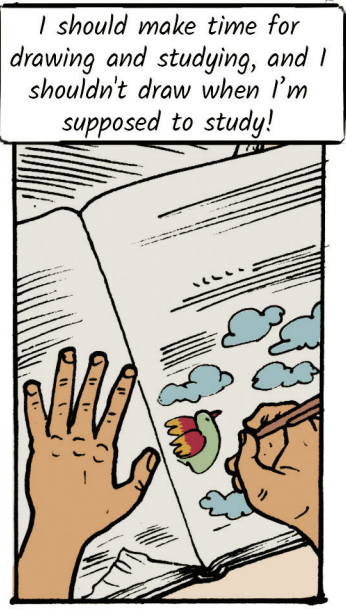

I should make time for drawing and studying, and I shouldn't draw when I'm supposed to study!

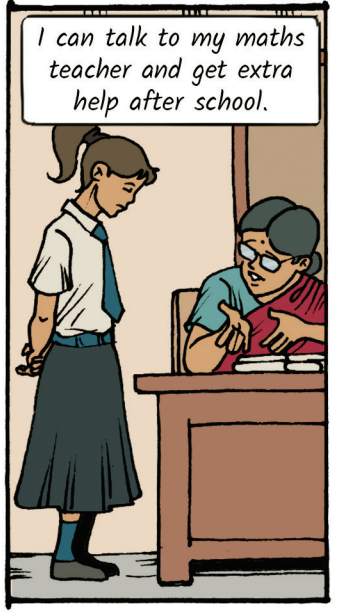

I can talk to my maths teacher and get extra help after school.

**P**

Write down your main Problem.

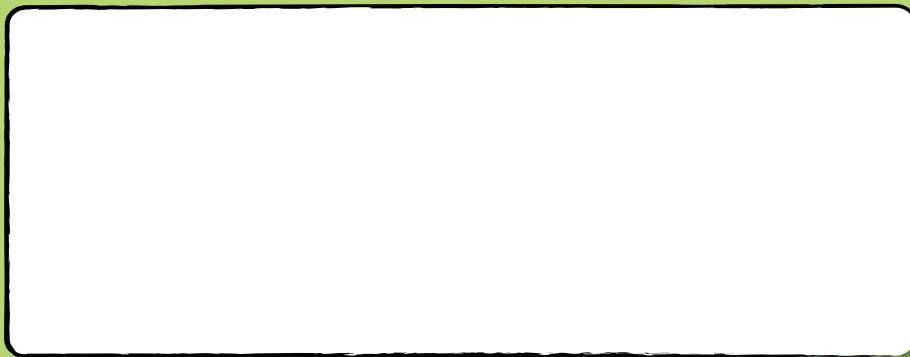

**O**

Write down the best Option you have chosen to solve your problem.



Supplement: mmc3.pdf [file mmc3.pdf]
